# Supplementary material
Source: PubMed Central journal article supplement (PMC8735811)
Supplement: cc9-4-e0610-s001.pdf [file cc9-4-e0610-s001.pdf]

|                                                       |                                                                   |
|-------------------------------------------------------|-------------------------------------------------------------------|
| <b>Clinical Score</b>                                 |                                                                   |
| <b>qSOFA:<br/>Presence of 2/3 of:</b>                 | GCS<14                                                            |
|                                                       | RR >22 bpm                                                        |
|                                                       | Systolic BP <100mmHg                                              |
| <b>SEPSIS-2<br/>Presence of 2/4 of:</b>               | HR >90 bpm                                                        |
|                                                       | RR > 20 bpm                                                       |
|                                                       | Temperature >38 or <36°C                                          |
|                                                       | WBCs >12000 or <4000 x10 <sup>9</sup> /L                          |
| <b>Mann-Salinas Criteria:<br/>Presence of 3/6 of:</b> | HR>130                                                            |
|                                                       | MAP<60                                                            |
|                                                       | BD<-6MEq/L                                                        |
|                                                       | Temperature <36°C                                                 |
|                                                       | Vasoactive Medications                                            |
|                                                       | Glucose >150mg/dL                                                 |
| <b>ABA Sepsis Criteria:<br/>Presence of 3/6 of:</b>   | Temperature >39 or <36°C                                          |
|                                                       | HR>110                                                            |
|                                                       | RR>25                                                             |
|                                                       | Platelets <100000/ $\mu$ L                                        |
|                                                       | Glucose >200mg/dL                                                 |
|                                                       | Feed intolerance (residuals 2x feeding rate, diarrhea >250cc/day) |

**Supplemental Table 1. Clinical sepsis diagnostic criteria.** Parameters used for the qSOFA, SEPSIS-2, ABA, and Mann-Salinas criteria. qSOFA= quick Sequential Organ Failure Assessment, GCS=Glasgow Coma Scale, RR=Respiratory Rate, BP= Blood Pressure, HR= Heart Rate, WBC= White Blood Cells, MAP= Mean Arterial Pressure, BD= Base Deficit, ABA= American Burn Association.
