# Supplementary material
Source: PubMed Central journal article supplement (PMC8735811)
Supplement: cc9-4-e0610-s002.pdf [file cc9-4-e0610-s002.pdf]

| Marker          | Healthy               | Non-septic            | Septic                                        | Overall P value |
|-----------------|-----------------------|-----------------------|-----------------------------------------------|-----------------|
| Adiponectin     | 816878 (51901)        | 1031517*<br>(28360)   | 1087254**<br>(27857)                          | 0.011           |
| RANTES          | 25211 (5523)          | 17409 (2044)          | 22377 (1530)                                  | 0.120           |
| CD31            | 29085 (6305)          | 24455 (1755)          | 31750 (1824)                                  | 0.096           |
| C5a             | 18152 (5256)          | 31838 (5826)          | 54538 (4937) <sup>YYY</sup>                   | 0.0002          |
| CX3CL1          | 3230 (1023)           | 3890 (462.3)          | 9510 (4365)                                   | 0.310           |
| IL-1 $\beta$    | 29 (4)                | 19.(3)                | 19 (2)                                        | 0.475           |
| IL-17           | 55 (6)                | 29 (5)                | 30 (4)                                        | 0.310           |
| IL-17E          | 4230 (1819)           | 3134 (453)            | 3210 (369)                                    | 0.682           |
| IL-33           | 70 (15)               | 43 (4)                | 38 (3)                                        | 0.156           |
| MMP-1           | 858 (221)             | 5510 (712)            | 7811 (523) <sup>***Y</sup>                    | 0.0001          |
| MMP-13          | 980 (102)             | 545 (60)*             | 584 (40)                                      | 0.035           |
| RAGE            | 2180 (42)             | 3307 (431)            | 3532 (247)                                    | 0.167           |
| Syndecan-1      | 1704 (674)            | 6276 (381)            | 8093 (425) <sup>**Y</sup>                     | 0.0002          |
| Tenascin        | 9891 (1025)           | 25393 (3622)          | 30342 (1627) <sup>***YY</sup>                 | 0.0001          |
| Aggrecan        | 1925 (115)            | 1720 (103)            | 1640 (84)                                     | 0.733           |
| CCL8            | 74 (6)                | 73 (7)                | 104 (6)                                       | 0.003           |
| Complement (C9) | 27161900<br>(7950695) | 13611926<br>(1124142) | 16854868<br>(2827954)                         | 0.273           |
| Galectin-1      | 29571 (2792)          | 38751 (2317)          | 56711 (2162) <sup>**</sup><br><sup>YYYY</sup> | <0.0001         |
| IL-6            | 11 (1)                | 97 (20)*              | 105 (17)*                                     | 0.014           |
| IL-17C          | 63 (6)                | 106 (16)              | 72 (10)                                       | 0.257           |
| IL-27           | 1218 (113)            | 990 (63)              | 988 (49)                                      | 0.456           |

|             |              |                             |                                  |         |
|-------------|--------------|-----------------------------|----------------------------------|---------|
| MMP-7       | 2354 (293)   | 3934 (514)                  | 6040 (460) <sup>*YYY</sup>       | <0.0001 |
| Osteopontin | 32524 (6459) | 222015 (23005) <sup>*</sup> | 347954 (43852) <sup>**</sup>     | 0.002   |
| P-selectin  | 21823 (3203) | 32670 (1813)                | 50032 (2857)<br><sup>**YYY</sup> | <0.0001 |
| Syndecan-4  | 1947 (701)   | 1878 (151)                  | 2448 (129) <sup>¥</sup>          | 0.039   |

**Supplemental Table 2. Protein biomarker concentrations.** Values in pg/ml are shown with Mean (SEM). <sup>\*</sup>-Significantly Different from Healthy. <sup>¥</sup>- significantly different from non-septic.
