# Supplementary material
Source: PubMed Central journal article supplement (PMC8735811)

## Procalcitonin

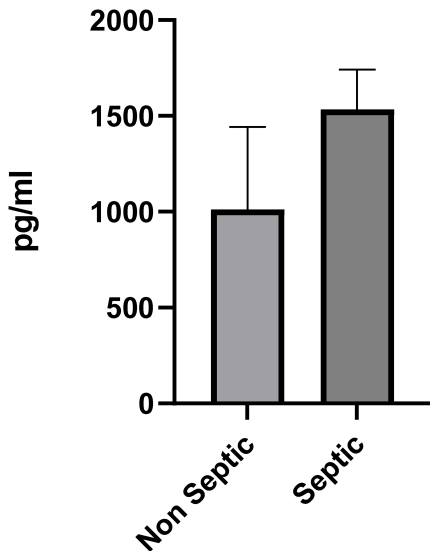

## ROC of Procalcitonin

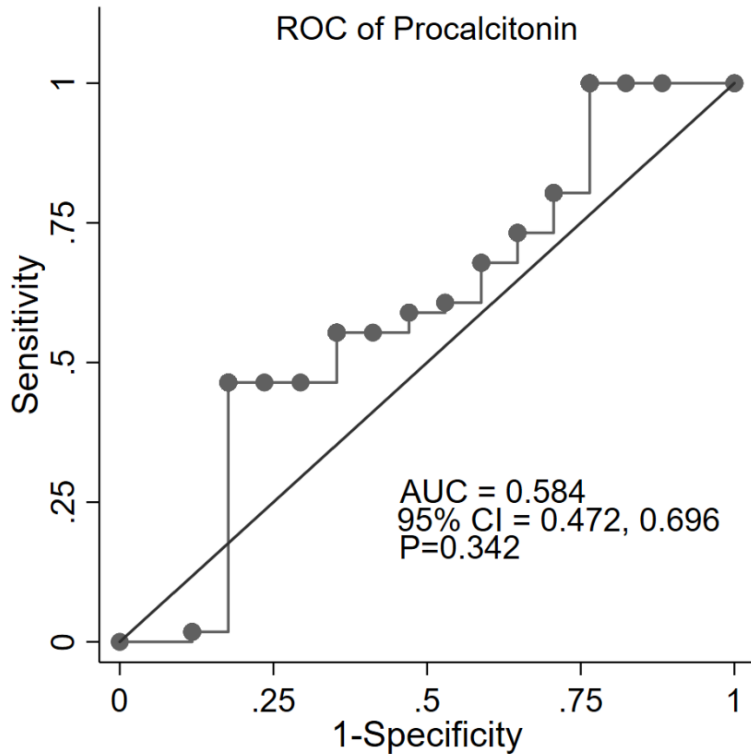

Supplement: cc9-4-e0610-s003.pdf [file cc9-4-e0610-s003.pdf]
